# Supplementary material for: Nature and nurture: confluence of pathway determinism with metabolic and chemical serendipity diversifiesMonascusazaphilone pigments
Source: Royal Society of Chemistry journal article supplement (doi:10.1039/c8np00060c), 2018-11-28
Supplement: c8np00060c1.pdf [file c8np00060c1.pdf]

ESI Table 1. MonAzPs congeners described in the literatures

| No. | Stage | Name             | Color  | MF*                                             | MW* | Structure                                                                            | Producer(s)                                                                     | Ref.* |
|-----|-------|------------------|--------|-------------------------------------------------|-----|--------------------------------------------------------------------------------------|---------------------------------------------------------------------------------|-------|
| 1   | IV    | Monascin         | Yellow | C <sub>21</sub> H <sub>26</sub> O <sub>5</sub>  | 358 | 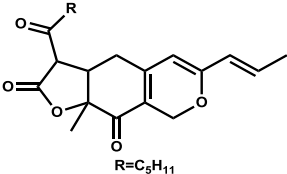   | <i>M. purpureus</i>                                                             | 1, 2  |
| 2   |       | Ankaflavin       |        | C <sub>23</sub> H <sub>30</sub> O <sub>5</sub>  | 386 |    | <i>M. anka</i>                                                                  | 3     |
| 3   |       | Rubropunctatin   | Orange | C <sub>21</sub> H <sub>22</sub> O <sub>5</sub>  | 354 |    | <i>M. purpureus</i>                                                             | 2     |
| 4   |       | Monascorubrin    |        | C <sub>23</sub> H <sub>26</sub> O <sub>5</sub>  | 382 |   |                                                                                 | 3     |
| 5   |       | Rubropunctamine  | Red    | C <sub>21</sub> H <sub>23</sub> NO <sub>4</sub> | 353 |  | <i>M. anka</i>                                                                  | 4, 5  |
| 6   |       | Monascorubramine |        | C <sub>23</sub> H <sub>27</sub> NO <sub>4</sub> | 381 |  |                                                                                 |       |
| 7   | I     | MA-3             | Yellow | C <sub>13</sub> H <sub>12</sub> O <sub>4</sub>  | 232 |  | <i>M. ruber</i> M7<br>and $\Delta$ <i>mppA</i><br>mutant of <i>M. purpureus</i> | 6-9   |
| 8   |       | MA-4             |        | C <sub>13</sub> H <sub>10</sub> O <sub>5</sub>  | 246 |  |                                                                                 |       |
| 9   |       | MA-2             |        | C <sub>13</sub> H <sub>12</sub> O <sub>5</sub>  | 248 |  |                                                                                 |       |

|    |                   |                          |                   |     |                                                                                      |                                                          |    |
|----|-------------------|--------------------------|-------------------|-----|--------------------------------------------------------------------------------------|----------------------------------------------------------|----|
| 10 |                   | MA-1<br>(Monaspurpurone) | $C_{13}H_{14}O_5$ | 250 | 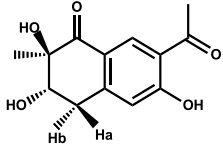   | <i>M. purpureus</i><br>BCRC 38113                        | 7  |
| 11 |                   | M7PKS-1                  | $C_{13}H_{16}O_5$ | 252 |    | <i>M. ruber</i> M7                                       | 10 |
| 12 | II                | Unnamed                  | $C_{13}H_{14}O_5$ | 250 |    |                                                          | 6  |
| 13 |                   | Monascusone A            | $C_{13}H_{18}O_5$ | 254 |    | <i>M. kaoliang</i><br>KB20M10.2                          | 11 |
| 14 | III               | Unnamed                  | $C_{21}H_{24}O_6$ | 372 |    | <i>M. ruber</i> M7                                       | 6  |
| 15 |                   |                          |                   |     |                                                                                      |                                                          |    |
| 16 |                   | Monasfluol A             | $C_{21}H_{26}O_6$ | 374 |  | <i>M. purpureus</i> IB1                                  | 12 |
| 17 |                   | Monasfluol B             | $C_{23}H_{30}O_6$ | 402 |  | $\Delta mpp7$ mutant<br>of <i>M.</i><br><i>purpureus</i> | 13 |
| 18 |                   | Unnamed                  | $C_{21}H_{28}O_6$ | 376 |  | <i>M. ruber</i> M7                                       | 6  |
| 19 | $C_{23}H_{32}O_6$ |                          |                   |     |                                                                                      |                                                          |    |

|    |                     |        |                      |     |                                                                                      |                                                      |    |
|----|---------------------|--------|----------------------|-----|--------------------------------------------------------------------------------------|------------------------------------------------------|----|
| 20 |                     | Red    | $C_{21}H_{29}NO_5$   | 375 | 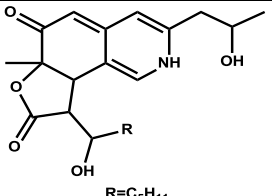   | <i>M. purpureus</i><br>NFCCI 1756                    | 14 |
| 21 | Acetyl-monasfluol A | Yellow | $C_{23}H_{28}O_7$    | 416 |    | <i>M. ruber</i> M7                                   | 6  |
| 22 | Acetyl-monasfluol B |        | $C_{25}H_{32}O_7$    | 444 |    |                                                      |    |
| 23 | Monascuskaolin      |        | $C_{27}H_{36}O_7$    | 472 |    | <i>M. kaoliang</i><br>BCRC 31506                     | 15 |
| 24 | FK17-P2B2           |        | $C_{13}H_{16}O_4$    | 236 |   | <i>M. kaoliang</i><br>KB20M10.2                      | 11 |
| 25 | Monascusone B       |        | $C_{17}H_{18}O_5$    | 302 |  |                                                      |    |
| 26 | Unnamed             | Red    | $C_{19}H_{28}N_2O_5$ | 364 |  | <i>M. ruber</i> 102w                                 | 16 |
| 27 | MC-2                | Yellow | $C_{21}H_{22}O_5$    | 354 |  | <i>mppc</i> mutant of<br><i>M. purpureus</i><br>KACC | 8  |
| 28 | MC-4                |        | $C_{23}H_{26}O_5$    | 382 |  |                                                      |    |

|    |                  |                   |     |                                                                                      |                                 |    |
|----|------------------|-------------------|-----|--------------------------------------------------------------------------------------|---------------------------------|----|
| 29 | Monasfluore A    | $C_{21}H_{24}O_5$ | 356 | 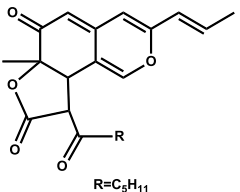   | <i>Monascus</i> sp.<br>AS3.4444 | 17 |
| 30 | Monasfluore B    | $C_{23}H_{28}O_5$ | 384 |    |                                 |    |
| 31 | Monapurone A     | $C_{20}H_{26}O_4$ | 330 |    | <i>M. purpureus</i><br>B0708    | 18 |
| 32 | Monapurone B     | $C_{21}H_{28}O_4$ | 344 |    |                                 |    |
| 33 | Monapurone C     | $C_{21}H_{28}O_4$ | 344 |  |                                 |    |
| 34 | Monapurfluore A  | $C_{23}H_{32}O_4$ | 372 |  | <i>M. purpureus</i><br>NTU 568  | 19 |
| 35 | Monapurfluore B  | $C_{23}H_{32}O_4$ | 372 |  |                                 |    |
| 36 | Monascuskaodione | $C_{24}H_{30}O_5$ | 398 |  | <i>M. kaoliang</i>              | 20 |
| 37 | Monascuspurone   | $C_{26}H_{34}O_5$ | 426 |  | <i>M. ruber</i>                 | 21 |

|    |    |                        |                   |     |                                                                                      |                                 |        |
|----|----|------------------------|-------------------|-----|--------------------------------------------------------------------------------------|---------------------------------|--------|
| 38 | IV | Unnamed                | $C_{21}H_{24}O_5$ | 356 | 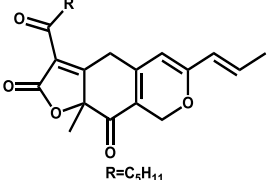   | <i>M. ruber</i> M7              | 6      |
| 39 |    |                        | $C_{23}H_{28}O_5$ | 384 |    |                                 |        |
| 40 |    | Monaphilone B          | $C_{20}H_{28}O_4$ | 332 |    | <i>M. purpureus</i><br>NTU 568  | 22     |
| 41 |    | Monaphilone A          | $C_{22}H_{32}O_4$ | 360 |    |                                 |        |
| 42 |    | Monaphilone C          | $C_{20}H_{32}O_4$ | 336 |   |                                 |        |
| 43 |    | Purpureusone           | $C_{23}H_{34}O_5$ | 390 |  |                                 |        |
| 44 |    | Monascuspiloin         | $C_{21}H_{28}O_5$ | 360 |  | <i>M. pilosus</i><br>M93        | 24, 25 |
| 45 |    | Monapilosus-azaphilone | $C_{23}H_{32}O_5$ | 388 |  | <i>M. pilosus</i>               | 26     |
| 46 |    | Monascusazaphilol      | $C_{25}H_{36}O_5$ | 416 |  | <i>M. pilosus</i><br>BCRC 38072 | 27     |

|    |                 |                   |                     |                                                                                      |                                                                                      |                                                                 |    |
|----|-----------------|-------------------|---------------------|--------------------------------------------------------------------------------------|--------------------------------------------------------------------------------------|-----------------------------------------------------------------|----|
| 47 | Unnamed         |                   | $C_{21}H_{28}NO_6$  | 376                                                                                  | 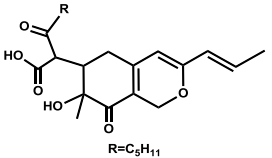   | Red yeast rice produced by uncharacterized <i>Monascus</i> spp. | 28 |
| 48 |                 |                   | $C_{23}H_{32}NO_6$  | 404                                                                                  |    |                                                                 |    |
| 49 |                 |                   | $C_{21}H_{27}NO_7S$ | 437                                                                                  |    |                                                                 |    |
| 50 |                 |                   | $C_{23}H_{31}NO_7S$ | 465                                                                                  |    |                                                                 |    |
| 51 |                 |                   | Monarubrin          | $C_{20}H_{26}O_4$                                                                    | 330                                                                                  |                                                                 |    |
| 52 | Rubropunctin    | $C_{22}H_{30}O_4$ | 358                 |  |                                                                                      |                                                                 |    |
| 53 | Unnamed         | Red               | $C_{18}H_{25}NO_3$  | 303                                                                                  |  | <i>M. ruber</i>                                                 | 30 |
| 54 |                 |                   | $C_{20}H_{29}NO_3$  | 331                                                                                  |  |                                                                 |    |
| 55 | Xanthomonasin A | Yellow            | $C_{21}H_{24}O_7$   | 388                                                                                  |  | <i>M. anka</i> U-1                                              | 31 |

|    |                       |        |                   |                    |                                                                                      |                                |    |                                                                                      |                                |    |
|----|-----------------------|--------|-------------------|--------------------|--------------------------------------------------------------------------------------|--------------------------------|----|--------------------------------------------------------------------------------------|--------------------------------|----|
| 56 | Xanthomonasin B       |        | $C_{23}H_{28}O_7$ | 416                | 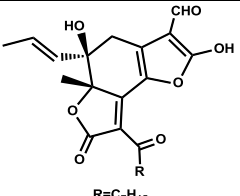   |                                |    |                                                                                      |                                |    |
| 57 | Yellow II             |        | $C_{22}H_{28}O_5$ | 372                |    | <i>M. sp.</i> KB 10            | 32 |                                                                                      |                                |    |
| 58 | Monapilol B           | Orange | $C_{23}H_{24}O_5$ | 356                |    | <i>M. purpureus</i><br>NTU 568 | 33 |                                                                                      |                                |    |
| 59 | Monapilol A           |        | $C_{23}H_{28}O_5$ | 384                |    |                                |    |                                                                                      |                                |    |
| 60 | Monapilol D           |        | $C_{24}H_{28}O_6$ | 412                |  |                                |    |                                                                                      |                                |    |
| 61 | Monapilol C           |        | $C_{26}H_{32}O_6$ | 440                |  |                                |    |                                                                                      |                                |    |
| 62 | Monasphilol-methoxy A |        | $C_{22}H_{26}O_6$ | 386                |  |                                |    | <i>M. aurantiacus</i><br>AS3.4384                                                    | 34                             |    |
| 63 | Monasphilol-methoxy B |        | $C_{24}H_{30}O_6$ | 414                |  |                                |    |                                                                                      |                                |    |
| 64 | Monascopyridine A     |        | Red               | $C_{21}H_{25}NO_4$ | 355                                                                                  |                                |    |  | <i>M. purpureus</i><br>DSM1379 | 35 |

|    |                                     |                    |     |                                                                                      |                                                                              |    |
|----|-------------------------------------|--------------------|-----|--------------------------------------------------------------------------------------|------------------------------------------------------------------------------|----|
| 65 | Monascopyridine B                   | $C_{23}H_{29}NO_4$ | 383 | 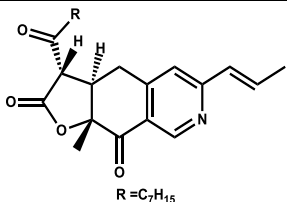   |                                                                              |    |
| 66 | Monascopyridine C                   | $C_{20}H_{27}NO_3$ | 315 |    | <i>M. purpureus</i><br>DSM 1603                                              | 36 |
| 67 | Monascopyridine D                   | $C_{22}H_{31}NO_3$ | 343 |    |                                                                              |    |
| 68 | <i>N</i> -glucosyl-rubropunctamine  | $C_{27}H_{33}NO_9$ | 515 |    | <i>M. ruber</i><br>ATCC 96218                                                | 37 |
| 69 | <i>N</i> -glucosyl-monascorubramine | $C_{29}H_{37}NO_9$ | 543 |  |                                                                              |    |
| 70 | <i>N</i> -glutaryl-rubropunctamine  | $C_{26}H_{29}NO_8$ | 483 |  | <i>M. sp.</i><br>TTWMB 6093                                                  | 38 |
| 71 | <i>N</i> -glutaryl-monascorubramine | $C_{28}H_{33}NO_8$ | 511 |  |                                                                              |    |
| 72 | Rubropunctatin<br>L-alanine         | $C_{24}H_{27}NO_6$ | 425 |  | Red yeast rice<br>produced by<br>uncharacterize<br>d <i>Monascus</i><br>spp. | 39 |
| 73 | Monascorubrin<br>L-alanine          | $C_{26}H_{31}NO_6$ | 453 |  |                                                                              |    |



|    |                               |                    |     |                                                                                      |                                                                    |        |
|----|-------------------------------|--------------------|-----|--------------------------------------------------------------------------------------|--------------------------------------------------------------------|--------|
| 74 | Rubropunctatin<br>L-aspartate | $C_{25}H_{27}NO_8$ | 469 | 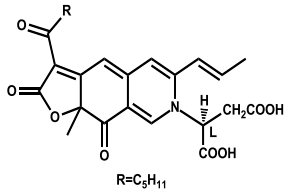   |                                                                    |        |
| 75 | Monascorubrin<br>L-aspartate  | $C_{27}H_{31}NO_8$ | 497 |    |                                                                    |        |
| 76 | Rubropunctatin<br>D-alanine   | $C_{24}H_{27}NO_6$ | 425 |    |                                                                    |        |
| 77 | Monascorubrin<br>D-alanine    | $C_{26}H_{31}NO_6$ | 453 |    |                                                                    |        |
| 78 | Rubropunctatin<br>D-aspartate | $C_{25}H_{27}NO_8$ | 469 |  |                                                                    |        |
| 79 | Monascorubrin<br>D-aspartate  | $C_{27}H_{31}NO_8$ | 497 |  |                                                                    |        |
| 80 | Rubropunctatin<br>glycine     | $C_{23}H_{25}NO_6$ | 411 |  | <i>M. purpureus</i><br>CCM 8152 and<br><i>M. sp.</i> KCCM<br>10093 | 40, 41 |
| 81 | Monascorubrin<br>glycine      | $C_{25}H_{29}NO_6$ | 439 |  |                                                                    |        |
| 82 | L-T-Bg                        | $C_{29}H_{37}NO_6$ | 495 |  | <i>M. sp.</i> J101                                                 | 42     |

|    |                               |                      |     |                                                                                      |                      |    |
|----|-------------------------------|----------------------|-----|--------------------------------------------------------------------------------------|----------------------|----|
| 83 | H-Nle                         | $C_{29}H_{37}NO_6$   | 495 | 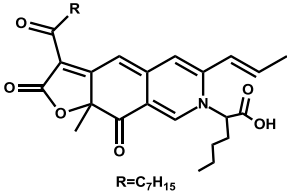   |                      |    |
| 84 | H-Cha                         | $C_{32}H_{41}NO_6$   | 535 |    |                      |    |
| 85 | H-Pen                         | $C_{28}H_{35}NO_6S$  | 513 |    |                      |    |
| 86 | Unnamed                       | $C_{27}H_{34}N_4O_6$ | 510 |   | <i>M. ruber</i> 102w | 16 |
| 87 |                               | $C_{29}H_{38}N_4O_6$ | 538 |  |                      |    |
| 88 | <i>N</i> -Lys-rubropunctatin  | $C_{27}H_{34}N_2O_6$ | 482 |  |                      |    |
| 89 | <i>N</i> -Lys-rubropunctatin  | $C_{27}H_{34}N_2O_6$ | 482 |  | <i>M. ruber</i> M7   | 6  |
| 90 | <i>N</i> -GABA-rubropunctatin | $C_{25}H_{29}NO_6$   | 439 |  |                      |    |

|    |                                 |                      |     |                                                                                      |                                                    |        |
|----|---------------------------------|----------------------|-----|--------------------------------------------------------------------------------------|----------------------------------------------------|--------|
| 91 | <i>N</i> -Lys-monascorubrin     | $C_{29}H_{38}N_2O_6$ | 510 | 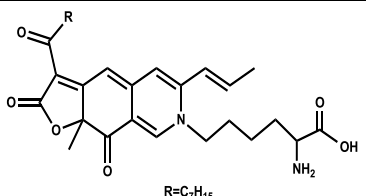   |                                                    |        |
| 92 | <i>N</i> -Lys-monascorubrin     | $C_{29}H_{38}N_2O_6$ | 510 |    |                                                    |        |
| 93 | <i>N</i> -GABA-monascorubrin    | $C_{27}H_{33}NO_6$   | 467 |    |                                                    |        |
| 94 | Glycyl-rubropunctatin           | $C_{23}H_{27}NO_6$   | 413 |    | <i>M. anka</i> and<br><i>M. purpureus</i>          | 43     |
| 95 | Glycyl-monascorubrin            | $C_{25}H_{31}NO_6$   | 441 |  |                                                    |        |
| 96 | Rubropunctatin<br>L-tryptophane | $C_{32}H_{34}N_2O_6$ | 542 |  | <i>M. ruber</i> and<br><i>Monascus</i> sp.<br>J101 | 42, 44 |
| 97 | Monascorubrin<br>L-tryptophane  | $C_{34}H_{38}N_2O_6$ | 570 |  |                                                    |        |
| 98 | Rubropunctatin<br>L-threonine   | $C_{24}H_{29}NO_7$   | 443 |  | <i>M. sp.</i> KCCM<br>10093                        | 44, 45 |
| 99 | Monascorubrin<br>L-threonine    | $C_{26}H_{33}NO_7$   | 471 |  |                                                    |        |

|     |                                    |        |                    |     |                                                                                      |                                                                                           |               |
|-----|------------------------------------|--------|--------------------|-----|--------------------------------------------------------------------------------------|-------------------------------------------------------------------------------------------|---------------|
| 100 | Rubropunctatin<br>D-tyrosine       |        | $C_{30}H_{33}NO_7$ | 519 | 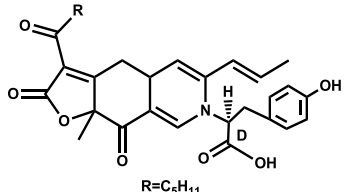   | <i>M. sp.</i> J101                                                                        | 42, 44        |
| 101 | Monascorubrin<br>D-tyrosine        |        | $C_{32}H_{37}NO_7$ | 547 |    |                                                                                           |               |
| 102 | Rubropunctatin ethyl<br>L-leucine  |        | $C_{29}H_{39}NO_6$ | 497 |    | <i>M. ruber</i> ,<br><i>Monascus sp.</i><br>KCCM 10093<br>and <i>M. sp.</i><br>TTWMB 6093 | 44, 46,<br>47 |
| 103 | Monascorubrin ethyl<br>L-leucine   |        | $C_{31}H_{43}NO_6$ | 525 |    |                                                                                           |               |
| 104 | Rubropunctatin ethyl<br>L-tyrosine |        | $C_{32}H_{37}NO_7$ | 547 |  | <i>M. ruber</i> and<br><i>Monascus sp.</i><br>KCCM 10093                                  | 47, 48        |
| 105 | Monascorubrin ethyl<br>L-tyrosine  |        | $C_{34}H_{41}NO_7$ | 575 |  |                                                                                           |               |
| 106 | Unnamed                            | Yellow | $C_{21}H_{24}NO_5$ | 356 |  | Red yeast rice<br>produced by<br>uncharacterize<br>d <i>Monascus</i><br>spp.              | 28            |
| 107 |                                    |        | $C_{23}H_{28}NO_5$ | 384 |  |                                                                                           |               |
| 108 | PP-O                               | Orange | $C_{23}H_{24}O_7$  | 412 |  | <i>Penicillium</i><br>sp. AZ                                                              | 48            |

|     |      |        |                                                 |     |                                                                                    |                                                                |    |
|-----|------|--------|-------------------------------------------------|-----|------------------------------------------------------------------------------------|----------------------------------------------------------------|----|
| 109 | PP-V | Purple | C <sub>23</sub> H <sub>25</sub> NO <sub>6</sub> | 411 | 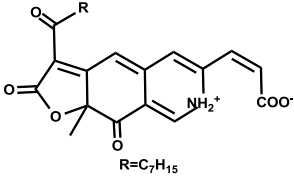 | <i>M. ruber</i> IBT 7904, 9655<br><i>M. purpureus</i> IBT 9664 | 49 |
| 110 | PP-Y | Orange | C <sub>23</sub> H <sub>26</sub> O <sub>5</sub>  | 382 |  | <i>Penicillium</i> sp.AZ                                       | 48 |
| 111 | PP-R | Red    | C <sub>25</sub> H <sub>31</sub> NO <sub>5</sub> | 425 |  |                                                                |    |

\* MW: Molecular weight; MF: Molecular formula; Ref: References

## References

1. H. Salomon and P. Karrer, *Helv. Chim. Acta* 1932, **15**, 18-22.
2. F. C. Chen, P. S. Manchard and W. B. Whalley, *J. Chem. Soc. D.*, 1969, 130-131.
3. P. S. Manchard and W. B. Whalley, *Phytochemistry*, 1973, **12**, 2531-2532.
4. S. Kumasaki, K. Nakanishi, E. Nishikawa and M. Ohashi, *Tetrahedron*, 1962, **18**, 1171-1184.
5. J. G. Sweeny, M. C. E. Valdes, Guillermo, A. Iacobucci, H. Sato and S. Sakamura, *J. Agric. Food Chem.*, 1981, **29**, 1189-1193.
6. W. Chen, R. Chen, Q. Liu, Y. He, K. He, X. Ding, L. Kang, X. Guo, N. Xie, Y. Zhou, Y. Lu, R. Cox, I. Molnar, M. Li, Y. Shao and F. Chen. *Chem. Sci.*, 2017, **8**, 4917-4925.
7. M. J. Cheng, M. D. Wu, I. S. Chen, C. Y. Chen, W. L. Lo and G. F. Yuan, *Nat. Prod. Res.*, 2010, **24**, 1719-1725.
8. B. Balakrishnan, J. W. Suh, S. H. Park and H. J. Kwon, *RSC Adv.*, 2014, **4**, 59405-59408.
9. Y. M. Chiang, C. E. Oakley, M. Ahuja, R. Entwistle, A. Schultz, S. L. Chang, C. T. Sung, C. C. Wang and B. R. Oakley, *J. Am. Chem. Soc.*, 2013, **135**, 7720-7731.
10. J. Liu, Y. Zhou, T. Yi, M. Zhao, N. Xie, M. Lei, Q. Liu, Y. Shao and F. Chen, *Appl. Microbiol. Biot.*, 2016, **100**, 7037-7049.
11. S. Jongrungruangchok, P. Kittakoop, B. Yongsmith, R. Bavovada, S. Tanasupawat, N. Lartpornmatulee and Y. Thebtaranonth, *Phytochemistry*, 2004, **65**, 2569-2575.
12. S. Campoy, A. Rumbero, J. F. Mart ın and P. Liras, *Appl. Microbiol. Biot.*, 2006, **70**, 488-496.
13. B. Balakrishnan, C. C. Chen, T. M. Pan and H. J. Kwon, *Tetrahedron Lett.*, 2014, **55**, 1640-1643.
14. G. Mukherjee and S. K. Singh, *Process Biochem.*, 2011, **46**, 188-192.
15. M. J. Cheng, M. D. Wu, Y. S. Su, G. F. Yuan, Y. L. Chen and I. S. Chen, *Phytochem. Lett.*, 2012, **5**, 262-266.
16. X. J. Lian, C. L. Wang and K. L. Guo, *Dyes Pigments*, 2007, **73**, 121-125.
17. Z. Huang, Y. Xu, L. Li and Y. Li, *J. Agric. Food Chem.*, 2008, **56**, 112-118.
18. J. J. Li, X. Y. Shang, L. L. Li, M. T. Liu, J. Q. Zheng and Z. L. Jin, *Molecules*, 2010, **15**, 1958-1966.
19. Y. W. Hsu, L. C. Hsu, C. L. Chang, Y. H. Liang, Y. H. Kuo and T. M. Pan, *Molecules*, 2010, **15**, 7815-7824.
20. M. J. Cheng, M. D. Wu, H.-Y. Chan, Y. C. Cheng, J. J. Chen, Y. L. Chen, I. S. Chen and G. F. Yuan, *Chem. Nat. Compd.*, 2015, **51**, 1091-1093.

21. M. J. Cheng, M. D. Wu, H. Y. Chan, J. J. Chen, Y. C. Cheng, Y. L. Chen, I. S. Chen and G. F. Yuan, *Chem. Nat. Compd.*, 2016, **52**, 231-233.
22. Y. W. Hsu, L. C. Hsu, Y. H. Liang, Y. H. Kuo and T. M. Pan, *J. Agric. Food Chem.*, 2010, **58**, 8211-8216.
23. M. J. Cheng, M. D. Wu, I. S. Chen, M. Tseng and G. F. Yuan, *Phytochem. Lett.*, 2011, **4**, 372-376.
24. R. J. Chen, C. M. Hung, Y. L. Chen, M. D. Wu, G. F. Yuan and Y. J. Wang, *J. Agric. Food Chem.*, 2012, **60**, 7185-7193.
25. H. W. Chiu, W. H. Fang, Y. L. Chen, M. D. Wu, G. F. Yuan, S. Y. Ho and Y. J. Wang, *Plos One*, 2012, **7**, e40462.
26. M. J. Cheng, M. D. Wu, Y. L. Chen, I. S. Chen, Y. S. Su and G. F. Yuan, *Chem. Nat. Compd.*, 2013, **49**, 249-252.
27. M. J. Cheng, M. D. Wu, G. F. Yuan, Y. S. Su and H. Yanai, *Phytochem. Lett.*, 2012, **5**, 567-571.
28. H. Yang, J. Li, Y. Wang and C. Gan, *Food Chem.*, 2018, **245**, 536-541.
29. M. O. Loret and S. Morel, *J. Agric. Food Chem.*, 2010, **58**, 1800-1803.
30. X. Lian, L. Liu, S. Dong, H. Wu, J. Zhao and Y. Han, *Eur. Food Res. Technol.*, 2015, **240**, 719-724.
31. K. Sato, S. Iwakami, Y. Goda and E. Okuyama, *Heterocycles*, 1992, **34**, 2057-2060.
32. B. Yongsmith, W. Tabloka, W. Yongmanitchai and R. Bavavoda, *World J. Microbiol. Biotechnol.*, 1993, **9**, 85-90.
33. Y. W. Hsu, L. C. Hsu, Y. H. Liang, Y. H. Kuo and T. M. Pan, *J. Agric. Food Chem.*, 2011, **59**, 4512-4518.
34. Z. Huang, S. Zhang, Y. Xu, L. Li and Y. Li, *Phytochem. Lett.*, 2014, **10**, 140-144.
35. D. Wild, G. Tóth and H. U. Humpf, *J. Agr. Food Chem.*, 2003, **51**, 5493-5496.
36. A. Knecht, B. Cramer and H. U. Humpf, *Mol. Nutr. Food Res.*, 2006, **50**, 314-321.
37. H. Hajjaj, A. Kláček, M. O. Loret, T. Tzedakis, G. Goma and P. J. Blanc, *Appl. Environ. Microbiol.*, 1997, **63**, 2671-2678.
38. T. F. Lin, K. Yakushijin, G. H. Bt~chi and A. L. Demain, *J. Ind. Microbiol.*, 1992, **9**, 173-179.
39. K. Sato, Y. Goda, S. S. Sakamoto and H. Shibata, *Chem. Pharm. Bull.*, 1997, **45**, 227-229.
40. H. Jung, C. Kim, K. Kim and C. S. Shin, *J. Agric. Food Chem.*, 2003, **51**, 1302-1306.
41. L. Martínková, P. Patáková Jůzlová, V. Krent, Z. Kucerová, V. Havlček, P. Olšovský, O. Hovorka, B. R. Hovák, D. Veselý, D. Veselá, J. Ulrichová and V. Prikrylová, *Food Addit. Contam.*, 1999, **16**, 15-24.
42. J. H. Kim, H. J. Kim, C. Kim, H. Jung, Y. O. Kim, J. Y. Ju and C. S. Shin, *Food Chem.*, 2007, **101**, 357-364.
43. S. Izawa, N. Harada, T. Watanabe, N. Kotokawa, A. Yamamoto, H. Hayatsu and S. Arimoto-Kobayashi, *J. Agric. Food Chem.*, 1997, **45**, 3980-3984.
44. J. M. Gao, S. X. Yang and J. C. Qin, *Chem. Rev.*, 2013, **113**, 4755-4811.
45. J. Jeun, H. Jung, J. Kim, Y. Kim, S. Youn and C. Shin, *Food Chem.*, 2008, **107**, 1078-1085.
46. T. F. Lin and A. L. Demain, *Arch. Microbiol.*, 1994, **162**, 114-119.
47. J. H. Kim, H. J. Kim, H. W. Park, S. H. Youn, D. Y. Choi and C. S. Shin, *FEMS Microbiol. Lett.*, 2007, **276**, 93-98.
48. J. Ogihara and K. Oishi, *J. Biosci. Bioeng.*, 2002, **93**, 54-59.
49. S. A. S. Mapari, M. E. Hansen, A. S. Meyer and U. Thrane, *J. Agric. Food Chem.*, 2008, **56**, 9981-9989.
